# Supplementary material for: Application of carbohydrate arrays coupled with mass spectrometry to detect activity of plant-polysaccharide degradative enzymes from the fungus Aspergillus niger
Source: PubMed Central journal article supplement (PMC5318901; doi:10.1038/srep43117), 2017-02-21
Supplement: srep43117-s1.pdf [file srep43117-s1.pdf]

**Application of carbohydrate arrays coupled with mass spectrometry to detect activity of plant-polysaccharide degradative enzymes from the fungus *Aspergillus niger***

Jolanda M van Munster<sup>1</sup>, Baptiste Thomas<sup>2</sup>, Michel Riese<sup>2</sup>, Adrienne L Davis<sup>3</sup>, Christopher J Gray<sup>2</sup>,  
David B Archer<sup>1</sup>, Sabine L Flitsch<sup>2</sup>

<sup>1</sup> Fungal Biology and Genetics, School of Life Sciences, University of Nottingham, University Park, Nottingham NG7 2RD, UK

<sup>2</sup> Chemical biology, Manchester Institute for Biotechnology, University of Manchester, 131 Princess Street, Manchester M1 7DN, United Kingdom

<sup>3</sup> School of Chemistry, University of Nottingham, University Park, Nottingham NG7 2RD, UK

**Supplementary information**

### Supplementary Information:

**Supplementary Figure S1:** Thin layer chromatography of **a** oligosaccharides generated by acid hydrolysis of wheat hemicelluloses and **b** of oligosaccharides generated by enzymatic hydrolysis of wheat arabinoxylan, with relevant fractions labelled below the sample application site (numbers H1-H11 and AX5-AX18) and M indicating the H and AX mixture of oligosaccharides before size separation, **c** MALDI-ToF MS spectra with indicated the DP (DP<sub>x</sub>) and spacing of the main pentose oligosaccharide series and spacing of a minor secondary series consisting of 4Me-GLcA decorated xylose oligosaccharides for oligosaccharides generated by acid hydrolysis of wheat hemicelluloses and **d** for oligosaccharides generated by enzymatic hydrolysis of wheat arabinoxylan. All labelled peaks are sodium adducts.

**Supplementary Figure S2. a** MALDI-ToF MS spectra for fraction AX10 with (a1) unlabeled starting oligosaccharide, (a2) labelling of free oligosaccharide by reductive amination and (a3) immobilization of labelled carbohydrates on the gold plate via hydrophobic interactions **b** MALDI-ToF MS spectra for fraction H9 with (b1) unlabeled starting oligosaccharide, (b2) labelling of free oligosaccharide via reductive amination and (b3) immobilization of labelled carbohydrates on the gold plate via hydrophobic interactions.

**Supplementary Figure S3.** MALDI-ToF MS analysis of signals derived from background hydrolysis and/or impurities in carbohydrate arrays used with commercial enzyme activity. Spectra showing substrate incubated with buffer only under reaction conditions of **a**  $\beta$ -glucosidase on cellotetraose-containing arrays, with DP4 + Na 914.5 m/z, DP4 + H 892.5 m/z (100%), DP3 + Na 752.4 m/z, DP3 + H 730.5 m/z (2.2%) while DP3 peak resulting from enzyme activity (Fig. 4) was 48%. **b** endoxylanase on xylohexaose-containing arrays with DP6 + H 1036.9 m/z (100%), DP5 + H 904.9 m/z (1.2%), DP4 + H 772.9 m/z (0.6%), DP3 + H 640.8 m/z (2.1%) while peaks resulting from enzyme activity (Fig. 4) were 5.3%, 9.1% and 6.4% respectively.

**Supplementary Table S1.** qRT-PCR primers

**Supplementary Table S2.** Shotgun proteomics identification of proteins in the filtrate of *A. niger* cultures grown in the presence of wheat straw with Score: SEQUEST protein score, #PSMs: total number of identified peptide sequences.

**Supplementary Table S3.** **a** Chemical shifts of  $^1\text{H}$ - $^1\text{H}$  TOCSY NMR of fraction H8, **b** chemical shifts of  $^1\text{H}$  and 2D  $^1\text{H}$ - $^{13}\text{C}$  HSQC NMR and **c** ratios of integrated  $^1\text{H}$  signals.

**Supplementary Table S4:** Ratio of the intensities of MALDI-ToF MS signal, calculated for DP5/DP8, DP6/DP8, DP5/DP6 of fraction AX10 after labelling via reductive amination using various reaction times and procedures. *Procedure a:* Excess of oligosaccharide, hexadecylamine (limiting reagent), excess of  $\text{NaBH}_3\text{CN}$ , sodium borate/sodium sulfate buffer. *Procedure b:* Oligosaccharide (limiting reagent), excess of hexadecylamine, excess of  $\text{NaBH}_3\text{CN}$ , sodium borate/sodium sulfate buffer. *Procedure c:* Excess of oligosaccharide, hexadecylamine (limiting reagent), excess of  $\text{NaBH}_3\text{CN}$ , sodium borate buffer.

**Supplementary Table S5:** Interday reproducibility of array generation, given as mean with standard deviation of the ratio of the intensities of MALDI-ToF MS signal, calculated for DP5/DP8, DP6/DP8, DP5/DP6 of fraction AX10 and H9 immobilised over multiple days.

Fig. S1a

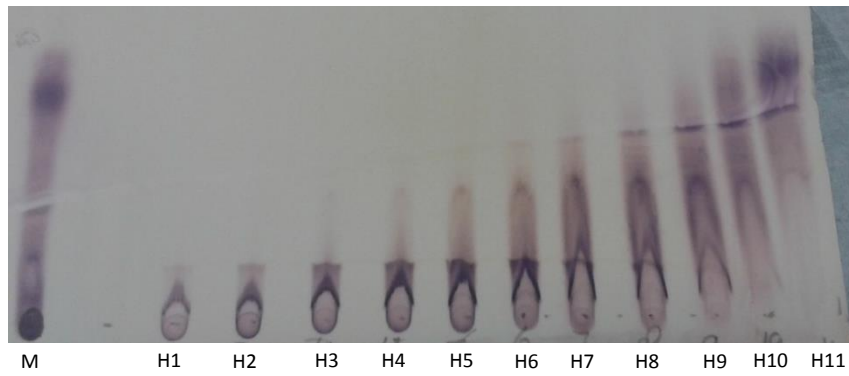

b

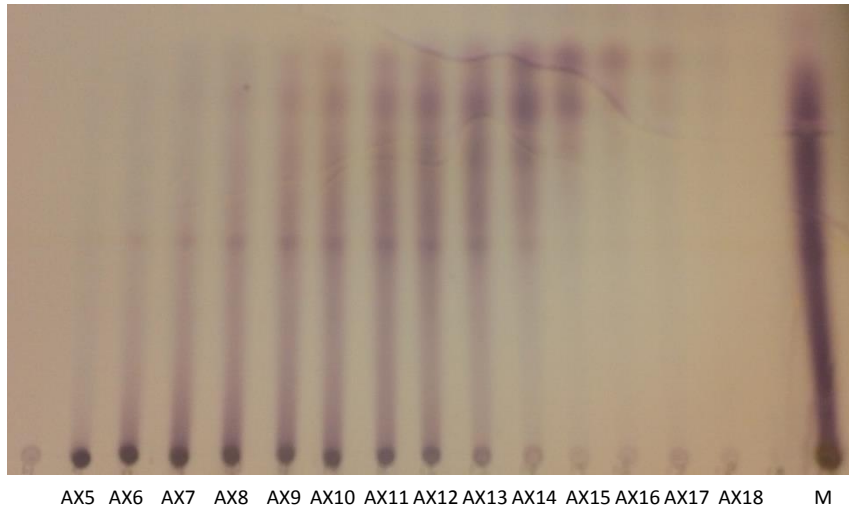

Fig. S1c

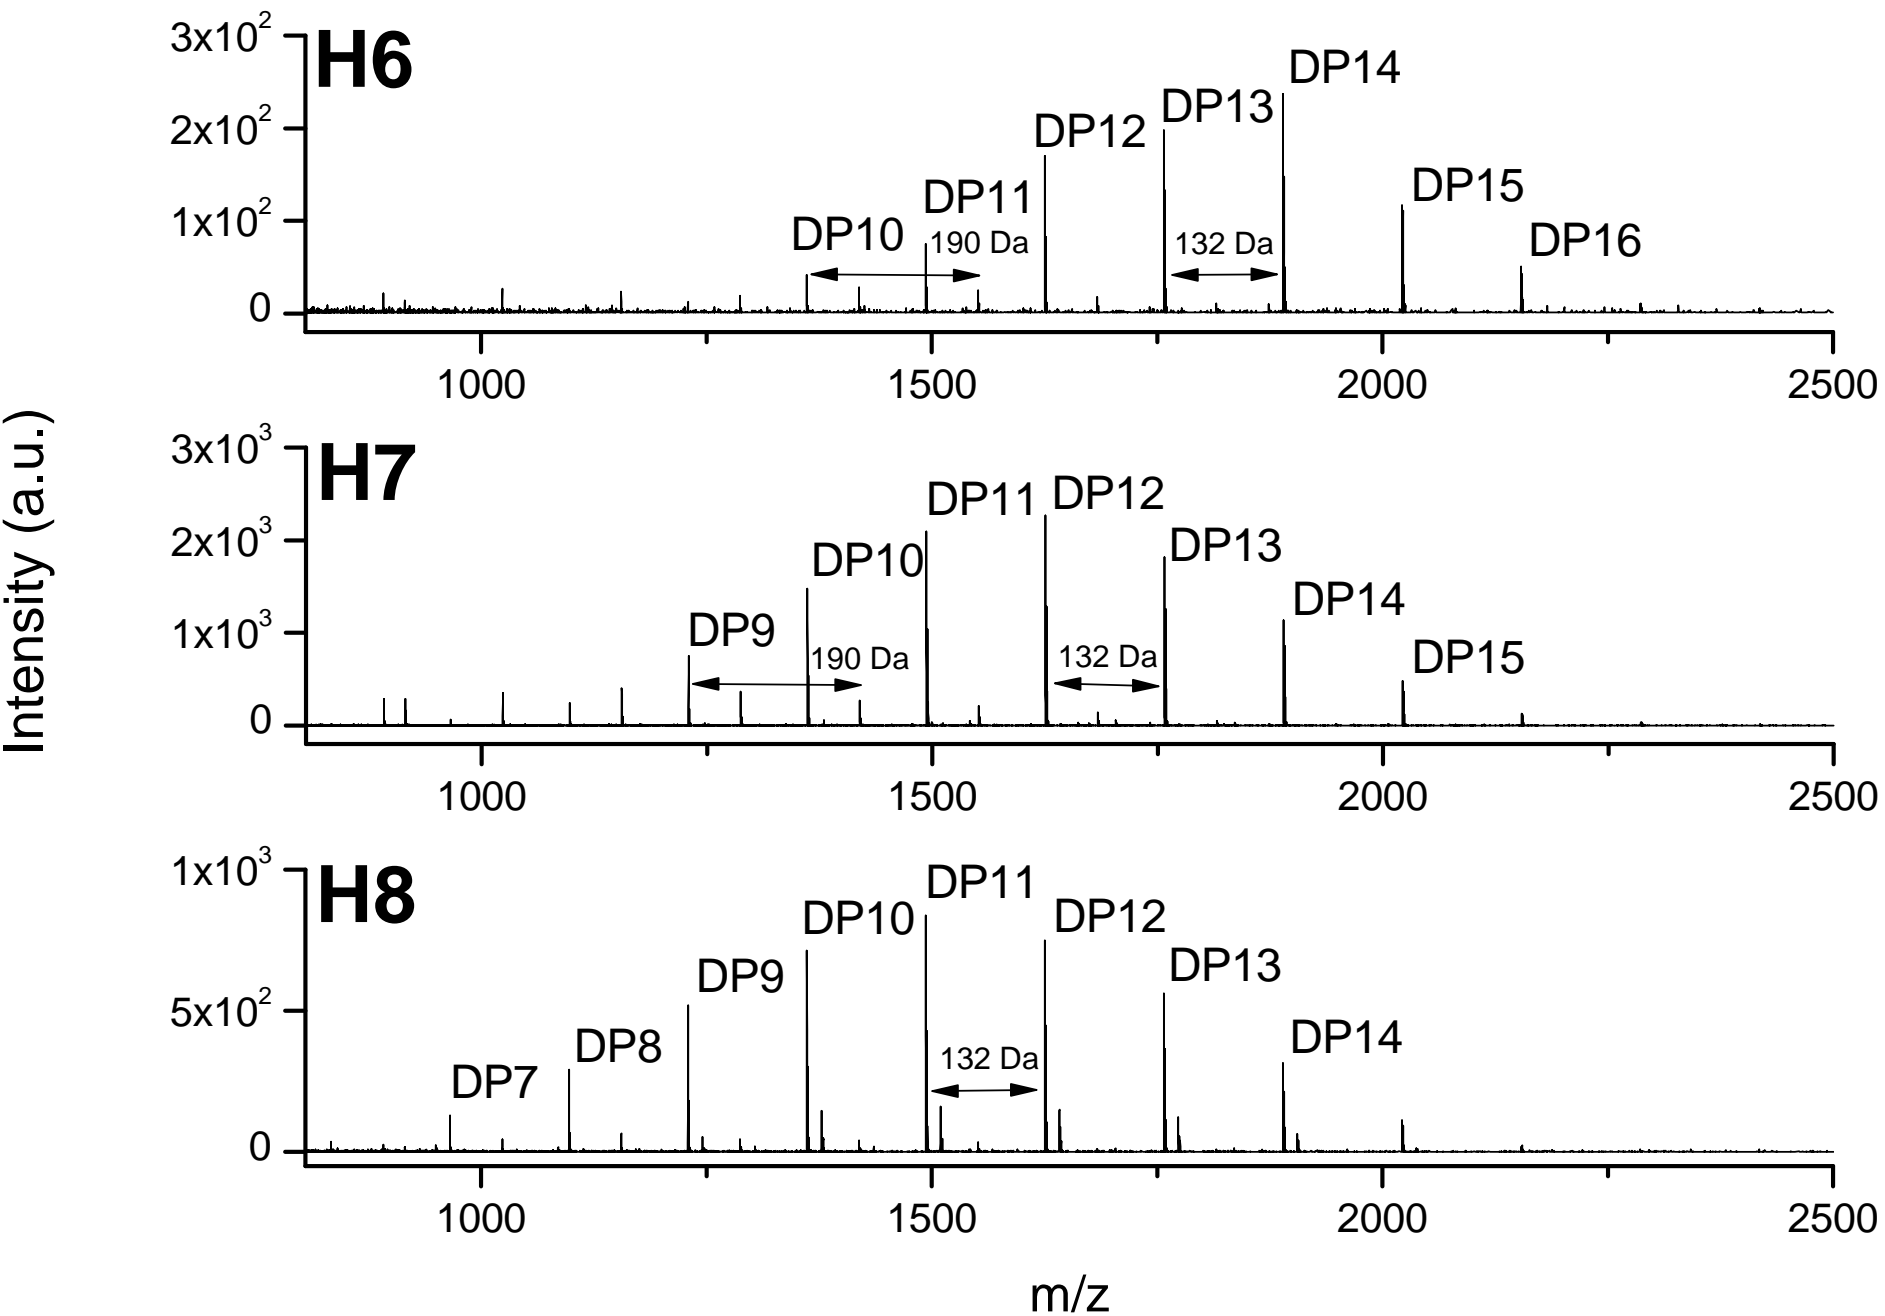

Fig. S1a

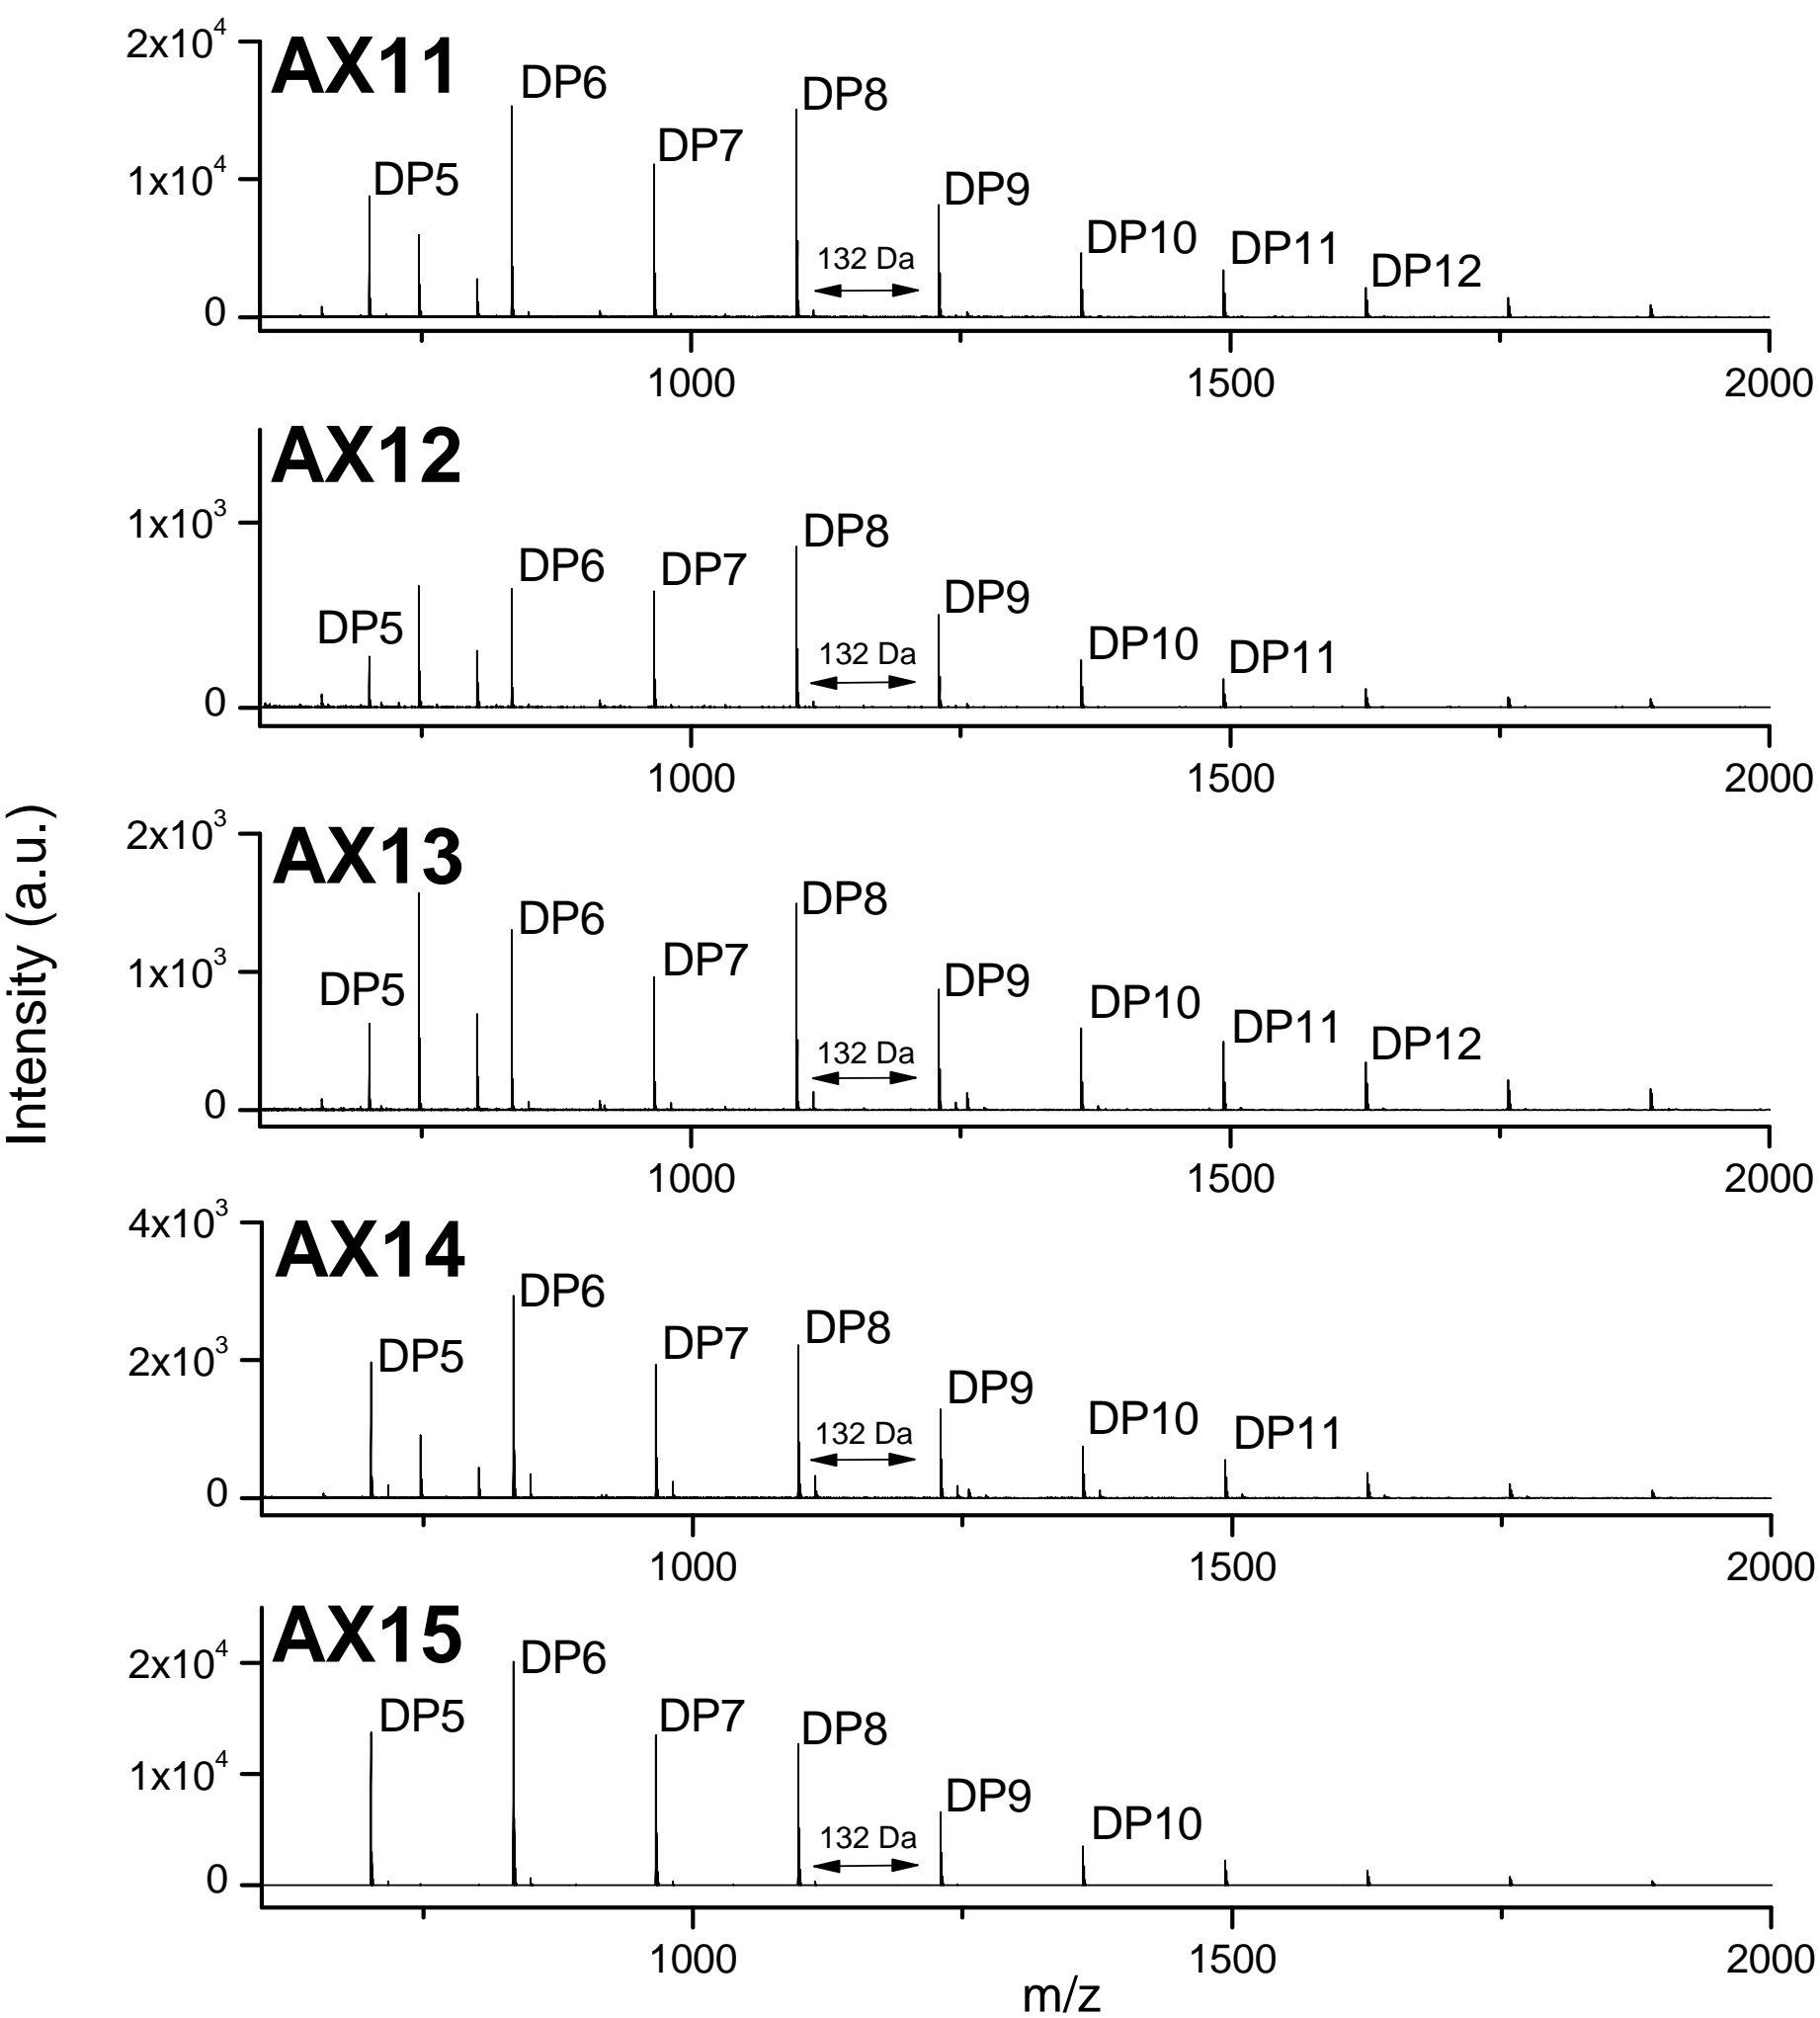

Fig. S2a

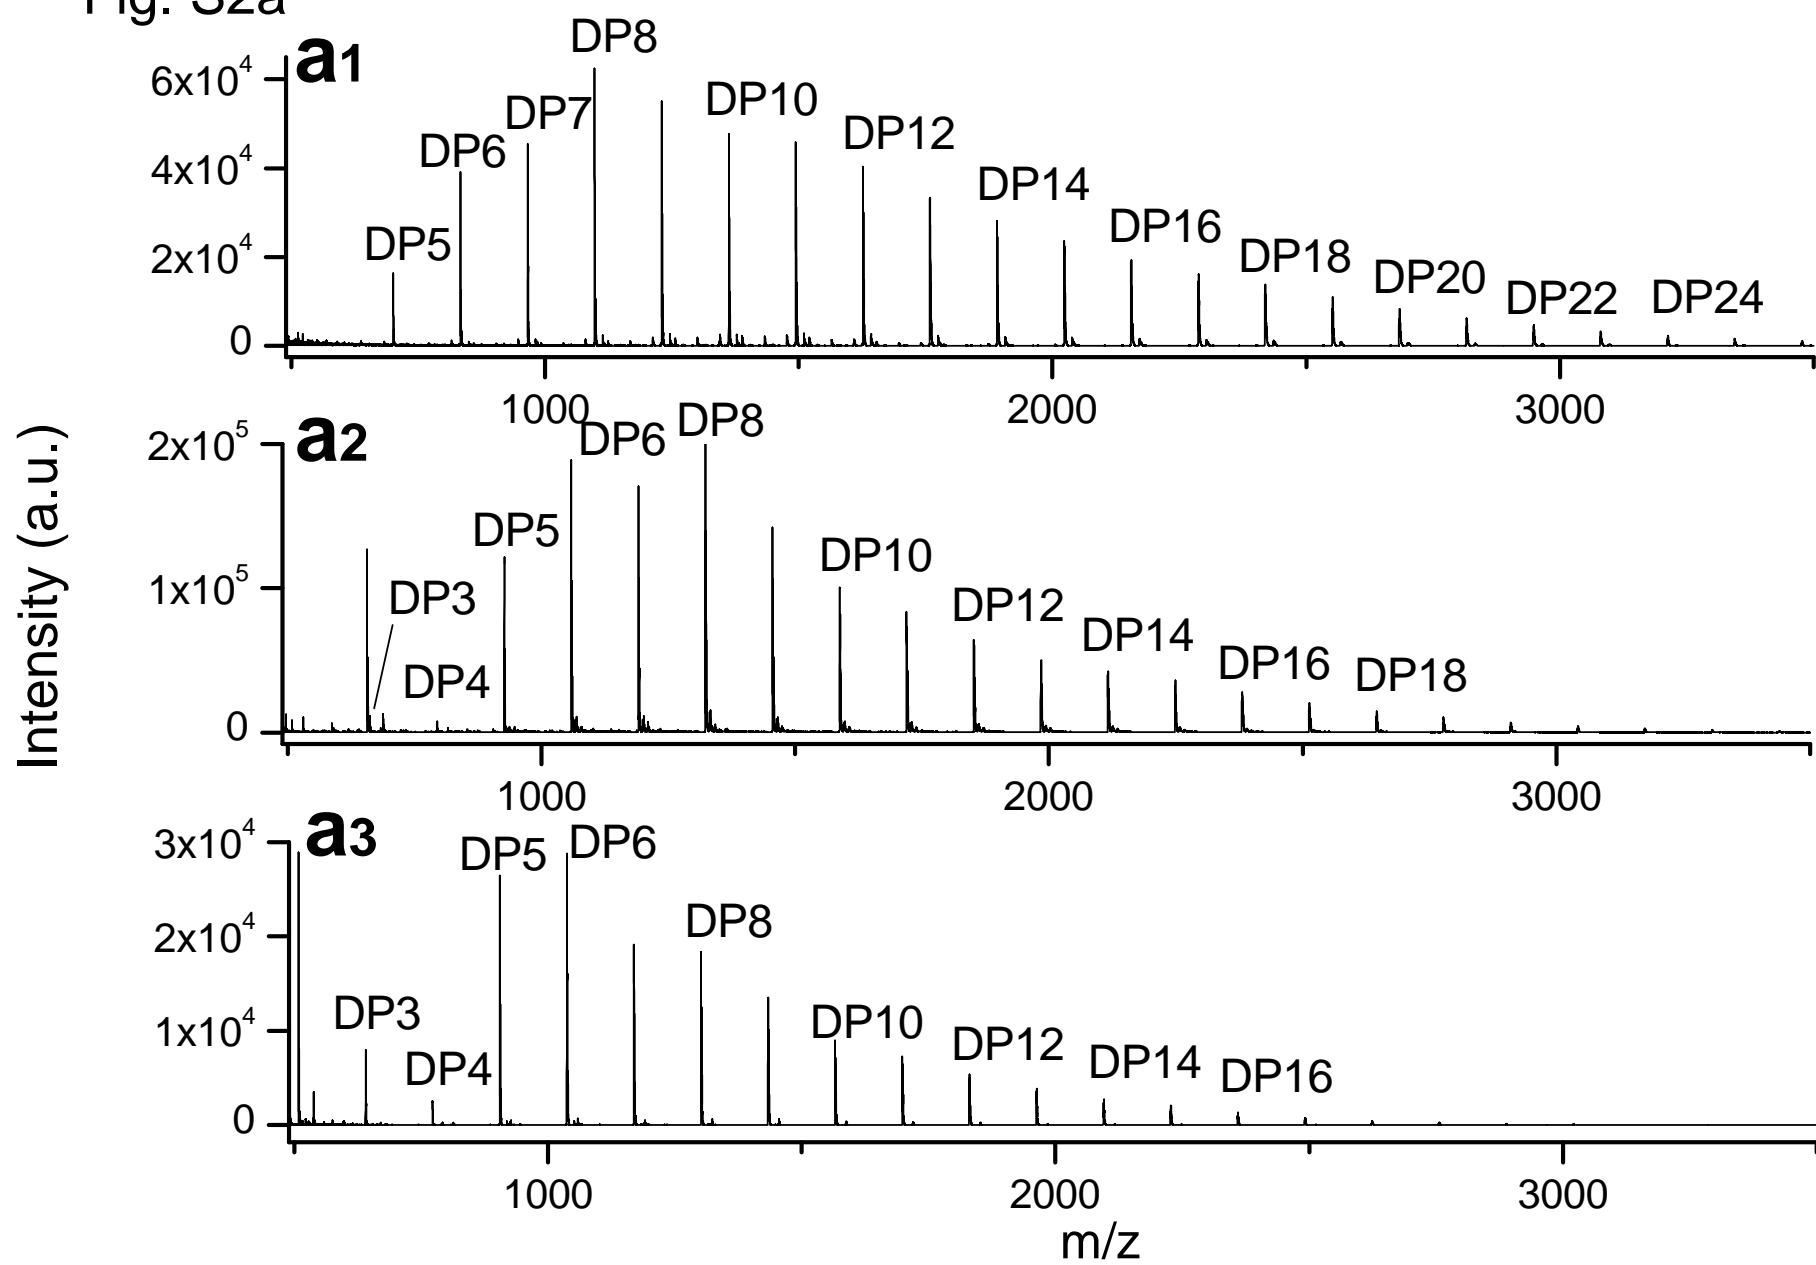

Fig. S2b

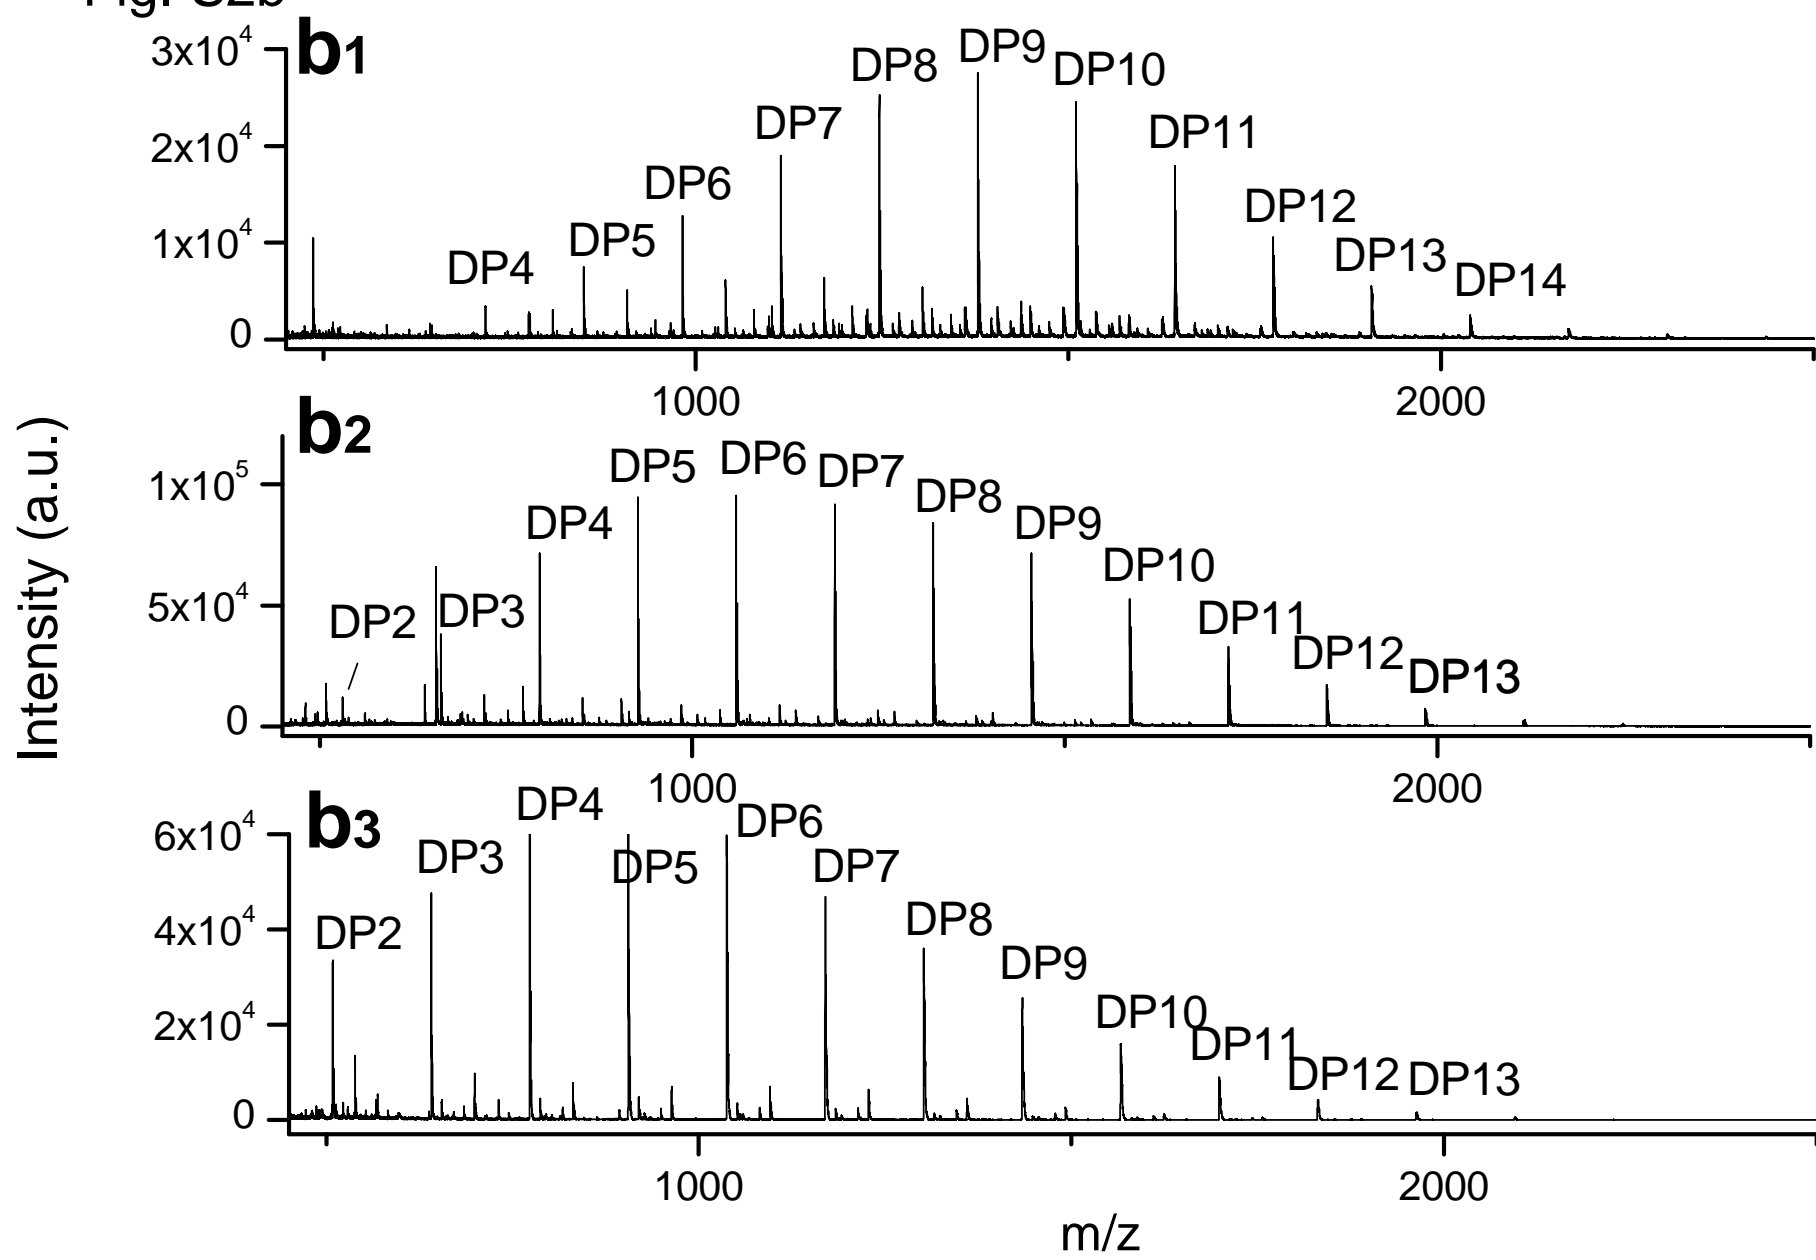



Fig. S3

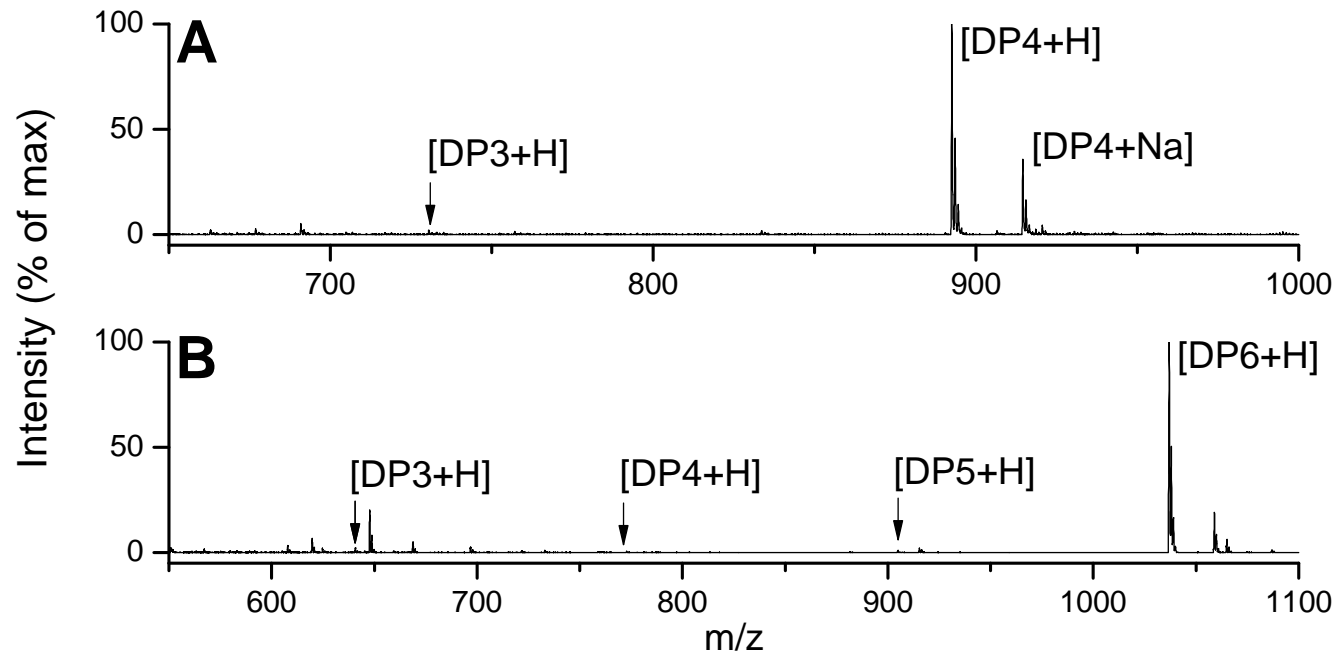

**Supplementary Table S1, primers used for qRT-PCR**

| gene name   | gene ID    | primer name  | sequence (5'-3')         | reference                                                           |
|-------------|------------|--------------|--------------------------|---------------------------------------------------------------------|
| <i>actA</i> | An15g00560 | An15g00560Fw | TCCTGGGTCTGGAGAGCGGTG    | van Munster, J. M. et al. <i>Fungal Genet Biol</i> (2014), 72:34-47 |
|             |            | An15g00560Rv | CTGCATACGGTCGGAGATACCGGG | van Munster, J. M. et al. <i>Fungal Genet Biol</i> (2014), 72:34-47 |
| <i>cbhA</i> | An07g09330 | cbhAFw       | CCAGCAAGCCGGAACGCTCA     | 9                                                                   |
|             |            | cbhARv       | AACGCGCCGTTTAGCCCACA     | 9                                                                   |
| <i>cbhB</i> | An01g11660 | cbhBFw       | CCAGCGATGGCAGCTGCAC      | 9                                                                   |
|             |            | cbhBRv       | CTGCCGGACGTGGTCACACC     | 9                                                                   |
| <i>xynB</i> | An01g00780 | xynBFw       | CACGACTCTGTGCCCAGCG      | 9                                                                   |
|             |            | xynBRv       | GGGGGTCAGTGGTCCAGCCA     | 9                                                                   |

| Supplementary Table S2; Shotgun Proteomics of <i>A. niger</i> culture filtrates |                                                                                                                                               |       |          | Biological replicate B |          |          |                   | Biological replicate A |          |          |                   |        |
|---------------------------------------------------------------------------------|-----------------------------------------------------------------------------------------------------------------------------------------------|-------|----------|------------------------|----------|----------|-------------------|------------------------|----------|----------|-------------------|--------|
| Accession                                                                       | Description                                                                                                                                   | # AAs | MW [kDa] | calc. pI               | Score    | Coverage | # Unique Peptides | # PSMs                 | Score    | Coverage | # Unique Peptides | # PSMs |
| A2QFV7                                                                          | Probable endo-1,4-beta-xylanase C OS=Aspergillus niger (strain CBS 513.88 / FGSC A1513) GN=xlnC PE=1 SV=1 - [XYNC_ASPNC]                      | 327   | 35.46    | 6.65                   | 3836.167 | 87.77    | 38                | 1293                   | 4386.343 | 87.77    | 38                | 1437   |
| A2QPG2                                                                          | Probable 1,4-beta-D-glucan cellobiohydrolase A OS=Aspergillus niger (strain CBS 513.88 / FGSC A1513) GN=cbhA PE=3 SV=1 - [CBHA_ASPNC]         | 452   | 48.22    | 4.32                   | 2510.741 | 52.43    | 12                | 694                    | 3181.424 | 52.43    | 12                | 863    |
| A2Q710                                                                          | Probable endo-1,4-beta-xylanase B OS=Aspergillus niger (strain CBS 513.88 / FGSC A1513) GN=xlnB PE=3 SV=1 - [XYNB_ASPNC]                      | 225   | 24.04    | 5.45                   | 2237.921 | 36.44    | 5                 | 715                    | 2421.212 | 36       | 4                 | 759    |
| A2QFV9                                                                          | Probable alpha-L-arabinofuranosidase axhA OS=Aspergillus niger (strain CBS 513.88 / FGSC A1513) GN=axhA PE=3 SV=1 - [AXHA_ASPNC]              | 332   | 35.81    | 4.86                   | 1629.407 | 61.45    | 13                | 502                    | 2057.846 | 61.45    | 13                | 601    |
| A2R511                                                                          | Probable alpha-L-arabinofuranosidase B OS=Aspergillus niger (strain CBS 513.88 / FGSC A1513) GN=abfB PE=3 SV=1 - [ABFB_ASPNC]                 | 499   | 52.48    | 4.44                   | 1160.002 | 35.87    | 11                | 356                    | 1273.708 | 35.87    | 11                | 376    |
| A2QA17                                                                          | Probable 1,4-beta-D-glucan cellobiohydrolase B OS=Aspergillus niger (strain CBS 513.88 / FGSC A1513) GN=cbhB PE=3 SV=1 - [CBHB_ASPNC]         | 536   | 56.17    | 4.30                   | 988.6004 | 34.51    | 10                | 328                    | 1214.966 | 34.51    | 10                | 430    |
| A2QS55                                                                          | Probable feruloyl esterase A OS=Aspergillus niger (strain CBS 513.88 / FGSC A1513) GN=faeA PE=3 SV=1 - [FAEA_ASPNC]                           | 281   | 30.53    | 4.55                   | 591.2076 | 44.48    | 10                | 207                    | 735.6362 | 44.48    | 10                | 247    |
| A2QA27                                                                          | Probable exo-1,4-beta-xylosidase xlnD OS=Aspergillus niger (strain CBS 513.88 / FGSC A1513) GN=xlnD PE=3 SV=1 - [XYND_ASPNC]                  | 804   | 87.16    | 4.89                   | 410.8238 | 34.45    | 22                | 150                    | 403.6227 | 34.58    | 22                | 149    |
| A2QPC3                                                                          | Probable endo-beta-1,4-glucanase B OS=Aspergillus niger (strain CBS 513.88 / FGSC A1513) GN=eglB PE=3 SV=1 - [EGLB_ASPNC]                     | 331   | 36.54    | 4.55                   | 332.6013 | 28.4     | 10                | 169                    | 332.4204 | 31.42    | 10                | 178    |
| A2RAL4                                                                          | Probable beta-glucosidase A OS=Aspergillus niger (strain CBS 513.88 / FGSC A1513) GN=bgIA PE=3 SV=1 - [BGLA_ASPNC]                            | 860   | 93.17    | 4.78                   | 307.6645 | 33.37    | 28                | 111                    | 276.1129 | 36.16    | 29                | 101    |
| A2QYU7                                                                          | Probable feruloyl esterase C OS=Aspergillus niger (strain CBS 513.88 / FGSC A1513) GN=faeC PE=3 SV=1 - [FAEC_ASPNC]                           | 270   | 28.57    | 5.02                   | 233.4921 | 36.67    | 6                 | 65                     | 284.6185 | 36.67    | 6                 | 72     |
| A2QAS2                                                                          | Probable mannosyl-oligosaccharide alpha-1,2-mannosidase 1B OS=Aspergillus niger (strain CBS 513.88 / FGSC A1513) GN=mns1B PE=3 SV=1 - [MNS1B] | 513   | 55.89    | 5.05                   | 213.7005 | 31.97    | 14                | 64                     | 225.6573 | 36.26    | 15                | 69     |
| A2R2L1                                                                          | Probable rhamnogalacturonate lyase A OS=Aspergillus niger (strain CBS 513.88 / FGSC A1513) GN=rgIA PE=3 SV=2 - [RGLA_ASPNC]                   | 531   | 57.10    | 4.60                   | 208.3747 | 20.9     | 10                | 71                     | 270.6945 | 22.22    | 9                 | 90     |
| A2R0E0                                                                          | Extracellular exo-inulinase inuE OS=Aspergillus niger (strain CBS 513.88 / FGSC A1513) GN=inuE PE=2 SV=1 - [INU_E_ASPNC]                      | 537   | 59.11    | 5.43                   | 197.594  | 38.73    | 16                | 88                     | 141.211  | 34.45    | 13                | 60     |
| A5ABF5                                                                          | Probable beta-glucosidase M OS=Aspergillus niger (strain CBS 513.88 / FGSC A1513) GN=bgIM PE=3 SV=1 - [BGLM_ASPNC]                            | 765   | 82.07    | 4.74                   | 163.5841 | 21.96    | 13                | 54                     | 162.2629 | 23.66    | 14                | 57     |
| A2R3L3                                                                          | Aspartic protease pep1 OS=Aspergillus niger (strain CBS 513.88 / FGSC A1513) GN=pep1 PE=3 SV=1 - [PEPA_ASPNC]                                 | 394   | 41.25    | 4.67                   | 131.3712 | 25.38    | 8                 | 56                     | 119.9708 | 24.62    | 8                 | 48     |
| A2R2S8                                                                          | Cell wall protein phiA OS=Aspergillus niger (strain CBS 513.88 / FGSC A1513) GN=phiA PE=2 SV=1 - [PHIA_ASPNC]                                 | 184   | 19.17    | 5.03                   | 120.3915 | 23.37    | 4                 | 34                     | 101.3156 | 25.54    | 5                 | 32     |
| A2QEJ9                                                                          | Probable alpha-galactosidase B OS=Aspergillus niger (strain CBS 513.88 / FGSC A1513) GN=aglB PE=3 SV=1 - [AGALB_ASPNC]                        | 443   | 48.80    | 5.08                   | 107.8469 | 23.25    | 9                 | 49                     | 114.5235 | 19.64    | 6                 | 53     |
| A2QKT4                                                                          | Probable mannan endo-1,4-beta-mannosidase A OS=Aspergillus niger (strain CBS 513.88 / FGSC A1513) GN=manA PE=1 SV=1 - [MANA_ASPNC]            | 383   | 41.22    | 4.61                   | 104.2714 | 31.59    | 7                 | 32                     | 118.8116 | 30.29    | 6                 | 32     |
| A2QAN3                                                                          | Probable beta-galactosidase A OS=Aspergillus niger (strain CBS 513.88 / FGSC A1513) GN=lacA PE=3 SV=1 - [BGAL_ASPNC]                          | 1007  | 109.64   | 5.21                   | 77.29582 | 20.56    | 15                | 33                     | 71.64827 | 21.75    | 15                | 32     |
| A2QH21                                                                          | Probable glucan endo-1,3-beta-glucosidase egIC OS=Aspergillus niger (strain CBS 513.88 / FGSC A1513) GN=egIC PE=3 SV=2 - [EGLC_ASPNC]         | 460   | 46.32    | 4.49                   | 74.7548  | 19.57    | 5                 | 25                     | 64.61966 | 19.57    | 5                 | 24     |
| A2QK83                                                                          | Probable endo-xylogalacturonan hydrolase A OS=Aspergillus niger (strain CBS 513.88 / FGSC A1513) GN=xghA PE=3 SV=1 - [XGHA_ASPNC]             | 406   | 42.10    | 4.51                   | 72.05174 | 17.24    | 6                 | 30                     | 58.36289 | 17.24    | 6                 | 23     |
| A2RB93                                                                          | Probable arabinogalactan endo-beta-1,4-galactanase A OS=Aspergillus niger (strain CBS 513.88 / FGSC A1513) GN=gaIA PE=3 SV=1 - [GANA_ASPNC]   | 350   | 38.67    | 4.07                   | 64.57549 | 24.29    | 7                 | 20                     | 88.52927 | 24.29    | 6                 | 25     |
| A2R2S6                                                                          | Probable alpha-galactosidase D OS=Aspergillus niger (strain CBS 513.88 / FGSC A1513) GN=agID PE=3 SV=2 - [AGALD_ASPNC]                        | 660   | 71.18    | 4.83                   | 61.81282 | 16.97    | 10                | 24                     | 50.46856 | 19.7     | 11                | 25     |
| A2RAR6                                                                          | Probable glucan 1,3-beta-glucosidase A OS=Aspergillus niger (strain CBS 513.88 / FGSC A1513) GN=exgA PE=3 SV=1 - [EXGA_ASPNC]                 | 416   | 45.50    | 5.19                   | 58.95625 | 25.24    | 9                 | 23                     | 49.66892 | 27.88    | 8                 | 19     |
| A2R3X3                                                                          | Probable alpha-glucuronidase A OS=Aspergillus niger (strain CBS 513.88 / FGSC A1513) GN=aguA PE=3 SV=1 - [AGUA_ASPNC]                         | 841   | 93.67    | 5.38                   | 55.70176 | 20.57    | 15                | 36                     | 80.58374 | 22.47    | 16                | 38     |
| A2QE06                                                                          | Beta-glucuronidase OS=Aspergillus niger (strain CBS 513.88 / FGSC A1513) GN=AnO2g11890 PE=1 SV=1 - [GUS79_ASPNC]                              | 541   | 58.82    | 5.47                   | 49.53932 | 20.52    | 8                 | 17                     | 50.59749 | 16.82    | 7                 | 15     |
| A2R0Z6                                                                          | Probable feruloyl esterase B OS=Aspergillus niger (strain CBS 513.88 / FGSC A1513) GN=faeB PE=3 SV=1 - [FAEB_ASPNC]                           | 521   | 57.17    | 5.20                   | 48.00242 | 14.01    | 5                 | 14                     | 54.39299 | 15.55    | 6                 | 16     |
| A2QYR9                                                                          | Probable 1,4-beta-D-glucan cellobiohydrolase C OS=Aspergillus niger (strain CBS 513.88 / FGSC A1513) GN=cbhC PE=3 SV=1 - [CBHC_ASPNC]         | 459   | 48.10    | 4.53                   | 45.85379 | 10.89    | 3                 | 27                     | 45.22075 | 18.52    | 4                 | 23     |
| A2Q7E0                                                                          | Probable alpha-L-arabinofuranosidase A OS=Aspergillus niger (strain CBS 513.88 / FGSC A1513) GN=abfA PE=3 SV=1 - [ABFA_ASPNC]                 | 628   | 67.91    | 4.30                   | 45.31327 | 13.22    | 6                 | 15                     | 29.4525  | 13.22    | 6                 | 12     |
| A2QT85                                                                          | Probable arabinan endo-1,5-alpha-L-arabinosidase A OS=Aspergillus niger (strain CBS 513.88 / FGSC A1513) GN=abnA PE=3 SV=1 - [ABNA_ASPNC]     | 321   | 34.46    | 4.22                   | 42.86552 | 4.67     | 2                 | 14                     | 37.9504  | 4.67     | 2                 | 11     |
| A2QK82                                                                          | Probable pectinesterase A OS=Aspergillus niger (strain CBS 513.88 / FGSC A1513) GN=pmeA PE=3 SV=1 - [PMEA_ASPNC]                              | 327   | 34.60    | 4.39                   | 42.15743 | 19.57    | 4                 | 18                     | 59.39917 | 23.24    | 5                 | 24     |
| A2R0G0                                                                          | Probable exopolysaccharuronase X OS=Aspergillus niger (strain CBS 513.88 / FGSC A1513) GN=pgxA PE=3 SV=1 - [PGLRX_ASPNC]                      | 435   | 47.26    | 4.82                   | 39.48248 | 15.63    | 5                 | 13                     | 22.17836 | 13.56    | 3                 | 10     |
| A2QH60                                                                          | Probable exopolysaccharuronase B OS=Aspergillus niger (strain CBS 513.88 / FGSC A1513) GN=pgxB PE=3 SV=1 - [PGXB_ASPNC]                       | 438   | 48.35    | 4.86                   | 39.31279 | 22.6     | 9                 | 18                     | 25.81601 | 18.95    | 7                 | 14     |
| A2R797                                                                          | Probable alpha-fucosidase A OS=Aspergillus niger (strain CBS 513.88 / FGSC A1513) GN=afca PE=3 SV=1 - [AFCA_ASPNC]                            | 793   | 86.51    | 4.91                   | 24.53108 | 16.52    | 12                | 15                     | 22.9456  | 11.6     | 7                 | 10     |
| A5AAG2                                                                          | Probable arabinan endo-1,5-alpha-L-arabinosidase C OS=Aspergillus niger (strain CBS 513.88 / FGSC A1513) GN=abnC PE=3 SV=1 - [ABNC_ASPNC]     | 318   | 34.03    | 4.87                   | 24.49346 | 10.69    | 4                 | 12                     | NA       | NA       | NA                | NA     |
| A2RAY7                                                                          | Putative galacturan 1,4-alpha-galacturonidase C OS=Aspergillus niger (strain CBS 513.88 / FGSC A1513) GN=rgxC PE=2 SV=1 - [RGXC_ASPNC]        | 423   | 45.87    | 5.20                   | 22.18053 | 16.55    | 4                 | 9                      | 20.71233 | 11.58    | 3                 | 6      |
| A2Q877                                                                          | Probable xyloglucan-specific endo-beta-1,4-glucanase A OS=Aspergillus niger (strain CBS 513.88 / FGSC A1513) GN=xgeA PE=3 SV=1 - [XGEA_ASPNC] | 241   | 25.47    | 3.88                   | 21.76691 | 14.11    | 2                 | 11                     | 21.61399 | 14.11    | 2                 | 12     |
| A2QA64                                                                          | Probable beta-galactosidase B OS=Aspergillus niger (strain CBS 513.88 / FGSC A1513) GN=lacB PE=3 SV=2 - [BGALB_ASPNC]                         | 1017  | 111.74   | 5.00                   | 21.22608 | 6        | 6                 | 9                      | 15.32841 | 5.9      | 6                 | 8      |
| A2QV36                                                                          | Probable pectate lyase A OS=Aspergillus niger (strain CBS 513.88 / FGSC A1513) GN=plyA PE=3 SV=1 - [PLYA_ASPNC]                               | 323   | 34.30    | 4.82                   | 19.75821 | 13.62    | 4                 | 14                     | 28.6039  | 13.62    | 4                 | 15     |
| A2QAH3                                                                          | Probable endopolysaccharuronase 1 OS=Aspergillus niger (strain CBS 513.88 / FGSC A1513) GN=pgal PE=3 SV=1 - [PGLR1_ASPNC]                     | 368   | 38.09    | 4.48                   | 19.3904  | 13.32    | 4                 | 11                     | 22.07549 | 11.96    | 3                 | 9      |
| A2QW66                                                                          | Probable exopolysaccharuronase A OS=Aspergillus niger (strain CBS 513.88 / FGSC A1513) GN=pgxA PE=3 SV=1 - [PGXA_ASPNC]                       | 434   | 46.94    | 4.79                   | 18.59541 | 10.14    | 5                 | 10                     | 22.42316 | 10.14    | 5                 | 10     |
| A2QE55                                                                          | Probable rhamnogalacturonase A OS=Aspergillus niger (strain CBS 513.88 / FGSC A1513) GN=rhgA PE=3 SV=1 - [RHGA_ASPNC]                         | 446   | 46.93    | 4.23                   | 16.74227 | 15.02    | 4                 | 7                      | 24.95915 | 5.83     | 2                 | 8      |
| A2QL72                                                                          | Probable alpha-galactosidase A OS=Aspergillus niger (strain CBS 513.88 / FGSC A1513) GN=aglA PE=3 SV=1 - [AGALA_ASPNC]                        | 537   | 59.18    | 5.03                   | 16.61905 | 11.92    | 5                 | 10                     | 18.05999 | 5.4      | 3                 | 8      |
| A2R311                                                                          | Probable pectin lyase A OS=Aspergillus niger (strain CBS 513.88 / FGSC A1513) GN=pelA PE=3 SV=1 - [PELA_ASPNC]                                | 379   | 39.76    | 4.34                   | 16.34141 | 16.09    | 5                 | 11                     | 14.46537 | 8.97     | 3                 | 9      |
| A2QTU5                                                                          | Alpha-xylosidase A OS=Aspergillus niger (strain CBS 513.88 / FGSC A1513) GN=axIA PE=1 SV=1 - [XYLA_ASPNC]                                     | 736   | 82.54    | 5.66                   | 14.92676 | 13.04    | 7                 | 10                     | 22.78718 | 13.18    | 7                 | 12     |
| A2QEW2                                                                          | Probable exopolysaccharuronase C OS=Aspergillus niger (strain CBS 513.88 / FGSC A1513) GN=pgxC PE=3 SV=2 - [PGXC_ASPNC]                       | 440   | 47.82    | 5.20                   | 14.81849 | 9.09     | 3                 | 6                      | NA       | NA       | NA                | NA     |
| A2QWU9                                                                          | Beta-mannosidase A OS=Aspergillus niger (strain CBS 513.88 / FGSC A1513) GN=mndA PE=3 SV=1 - [MANBA_ASPNC]                                    | 931   | 103.96   | 5.29                   | 14.74085 | 12.14    | 7                 | 11                     | 6.310669 | 5.91     | 4                 | 4      |
| P0C953                                                                          | Histone H2A OS=Aspergillus niger (strain CBS 513.88 / FGSC A1513) GN=htta PE=3 SV=1 - [H2A_ASPNC]                                             | 134   | 14.14    | 10.55                  | 8.224466 | 11.94    | 2                 | 4                      | 4.499234 | 11.94    | 2                 | 4      |
| A2R2W3                                                                          | Probable cutinase 1 OS=Aspergillus niger (strain CBS 513.88 / FGSC A1513) GN=An14g02170 PE=3 SV=1 - [CUTI1_ASPNC]                             | 262   | 26.67    | 4.88                   | 7.27599  | 9.92     | 2                 | 3                      | 10.04579 | 9.92     | 2                 | 3      |
| A2QCV8                                                                          | Probable endopolysaccharuronase B OS=Aspergillus niger (strain CBS 513.88 / FGSC A1513) GN=pgaB PE=3 SV=1 - [PGLRB_ASPNC]                     | 362   | 37.80    | 6.77                   | 7.110866 | 9.67     | 3                 | 4                      | 4.506392 | 6.63     | 2                 | 2      |
| A2QUQ2                                                                          | Endochitinase A OS=Aspergillus niger (strain CBS 513.88 / FGSC A1513) GN=ctcA PE=2 SV=1 - [CHIA1_ASPNC]                                       | 1257  | 122.02   | 4.55                   | 5.929324 | 0.88     | 2                 | 3                      | 4.313844 | 0.88     | 2                 | 2      |
| A2QY49                                                                          | Histone H2B OS=Aspergillus niger (strain CBS 513.88 / FGSC A1513) GN=htb1 PE=3 SV=1 - [H2B_ASPNC]                                             | 141   | 14.99    | 10.13                  | 4.44716  | 18.44    | 3                 | 4                      | 4.437262 | 13.48    | 2                 | 3      |
| A2QE32                                                                          | 40S ribosomal protein S0 OS=Aspergillus niger (strain CBS 513.88 / FGSC A1513) GN=rps0 PE=3 SV=1 - [RSSA_ASPNC]                               | 298   | 31.93    | 4.91                   | 4.07477  | 6.71     | 2                 | 2                      | NA       | NA       | NA                | NA     |
| A5ABH4                                                                          | Probable rhamnogalacturonate lyase B OS=Aspergillus niger (strain CBS 513.88 / FGSC A1513) GN=rglB PE=3 SV=1 - [RGLB_ASPNC]                   | 706   | 78.37    | 5.11                   | 2.444819 | 4.25     | 3                 | 4                      | 0        | 2.97     | 2                 | 4      |

| Protons      | Chemical shift (p.p.m.) |                                     |
|--------------|-------------------------|-------------------------------------|
|              | Internal $\beta$ -Xylp  | Non-reducing terminal $\beta$ -Xylp |
| $^1\text{H}$ | 4.48                    | 4.46                                |
| $^2\text{H}$ | 3.29                    | 3.26                                |
| $^3\text{H}$ | 3.556                   | 3.42                                |
| $^4\text{H}$ | 3.79                    | 3.62                                |
| $^5\text{H}$ | 4.10, 3.38              | 3.97, 3.31                          |

**Table S3a, Upfield  $^1\text{H}$  chemical shifts of xylose oligosaccharide as determined from the 2D TOCSY spectrum of fraction H8**

| Residue                                  | Chemical shift (p.p.m.) |                        |                   |                        |
|------------------------------------------|-------------------------|------------------------|-------------------|------------------------|
|                                          | Fraction AX14           |                        | Fraction H8       |                        |
|                                          | $^1\text{H}$ (1D)       | $^{13}\text{C}$ (HSQC) | $^1\text{H}$ (1D) | $^{13}\text{C}$ (HSQC) |
| $\alpha$ -Xylp <sup>1</sup>              | 5.184                   | 93.1                   | 5.183             | 92.9                   |
| $\beta$ -Xylp <sup>1</sup>               | 4.584                   | 97.6                   | 4.584             | 97.6                   |
| $\beta$ -Xylp <sup>2/3/4/5</sup>         | ~4.47                   | ~102.7                 | ~4.48             | ~102.8                 |
| $\alpha$ -Araf-X <sup>N</sup> -O3s       | 5.395                   | 108.7                  | NA                | NA                     |
| $\alpha$ -Araf-X <sup>N</sup> -O-2       | 5.224                   | 109.8                  | NA                | NA                     |
| $\alpha$ -Araf-X <sup>N</sup> -O-3d      | 5.273                   | 109.2                  | NA                | NA                     |
| $\beta$ -Xylp <sup>N</sup> -Af-O-2,3     | 4.640                   | 100.9                  | NA                | NA                     |
| $\beta$ -Xylp <sup>N</sup> -Af-O-3       | 4.43-4.45               | NR                     | NA                | NA                     |
| 4-O-Me- $\alpha$ -GlcA-X <sup>N</sup> -2 | NA                      | NA                     | 5.285             | ~98.7                  |
| $\alpha$ -GlcA-X <sup>N</sup> -2         | NA                      | NA                     | 5.303             | ~98.7                  |
| $\beta$ -Xylp <sup>N</sup> -GlcA         | NA                      | NA                     | 4.641             | ~102.7                 |
| $\beta$ -Xylp <sup>N</sup> -MeGlcA       | NA                      | NA                     | 4.623             | ~102.7                 |

**Table S3b, Assignment of chemical shifts of  $^1\text{H}$  and  $^1\text{H}$ - $^{13}\text{C}$  HSQC NMR anomeric resonances.** Xylp<sup>1</sup> is reducing end xylopyranose;  $\beta$ -Xylp<sup>2/3/4/5</sup> is the total of unsubstituted Xylp residues other than the reducing end;  $\alpha$ -Araf-X<sup>N</sup>-O- single (3s) or double (2 and 3d) arabinofuranosidase decoration on unidentified Xylp via  $\alpha$ -1,3-, or  $\alpha$ -1,2- and  $\alpha$ -1,3- linkage respectively;  $\beta$ -Xylp<sup>N</sup>-Af-O-3/2,3 Xylp with single/double Araf decoration respectively; (4-O-Me)- $\alpha$ -GlcA-X<sup>N</sup>-C2 signal for GlcA and 4MeGlcA attached via  $\alpha$ -1,2 to an unidentified Xylp,  $\beta$ -Xylp<sup>N</sup>-(Me)GlcA unidentified Xylp decorated with GlcA or 4MeGlcA, NA not identified in this fraction, NR not resolvable.

| Signal integration ratio $^1\text{H}$ (1D)                            | Fraction |     |     |      |      |
|-----------------------------------------------------------------------|----------|-----|-----|------|------|
|                                                                       | H6       | H7  | H8  | AX14 | AX15 |
| Xylp <sup>1</sup>                                                     | 1        | 1   | 1   | 1    | 1    |
| $\beta$ -Xylp <sup>2/3/4/5</sup>                                      | 8.2      | 6.5 | 6.3 | NR   | NR   |
| (4-O-Me)- $\alpha$ -GlcA-X <sup>N</sup> -C2                           | 1.1      | 0.7 | 0.6 | NA   | NA   |
| $\beta$ -Xylp <sup>N</sup> -(Me)GlcA                                  | 1.2      | 0.8 | 0.6 | NA   | NA   |
| $\beta$ -Xylp <sup>N</sup> -Af-O-2,3                                  | NA       | NA  | NA  | 0.4  | 0.3  |
| $\beta$ -Xylp <sup>N</sup> -Af-O-3 + $\beta$ -Xylp <sup>2/3/4/5</sup> | NA       | NA  | NA  | 3.5  | 3.0  |
| $\alpha$ -Araf-X <sup>N</sup> -O-3s                                   | NA       | NA  | NA  | 0.9  | 0.7  |
| $\alpha$ -Araf-X <sup>N</sup> -O-2                                    | NA       | NA  | NA  | 0.4  | 0.3  |
| $\alpha$ -Araf-X <sup>N</sup> -O-3d                                   | NA       | NA  | NA  | 0.4  | 0.3  |

**Table S3c, Signal integration ratios  $^1\text{H}$  NMR.** With the sum of the signal for the  $\alpha$ - and  $\beta$ -anomer of the reducing end xylopyranose (Xylp<sup>1</sup>) set to 1,  $\beta$ -Xylp<sup>N</sup>-Af-O-3 +  $\beta$ -Xylp<sup>2/3/4/5</sup> combined ratio for  $\beta$ -Xylp<sup>N</sup>-Af-O-3 and  $\beta$ -Xylp<sup>2/3/4/5</sup>, other notations as in Table S3b.

**Supplementary Table S4**

|                                   | DP5/DP8     |          |          | DP6/DP8     |          |          | DP5/DP6     |          |          |
|-----------------------------------|-------------|----------|----------|-------------|----------|----------|-------------|----------|----------|
| <i>Procedure</i>                  | <i>a</i>    | <i>b</i> | <i>c</i> | <i>a</i>    | <i>b</i> | <i>c</i> | <i>a</i>    | <i>b</i> | <i>c</i> |
| <i>1 hour</i>                     | 0.32        | 0.40     | 0.35     | 0.70        | 0.79     | 0.74     | 0.46        | 0.52     | 0.47     |
| <i>2 hours</i>                    | 0.39        | 0.39     | 0.38     | 0.77        | 0.80     | 0.76     | 0.50        | 0.50     | 0.50     |
| <i>4 hours</i>                    | 0.54 ± 0.02 | 0.37     | 0.40     | 0.92 ± 0.02 | 0.81     | 0.85     | 0.59 ± 0.01 | 0.48     | 0.47     |
| <i>8 hours</i>                    | 0.55        | 0.36     | 0.47     | 0.92        | 0.77     | 0.89     | 0.60        | 0.47     | 0.53     |
| <i>1 day</i>                      | 0.56        | 0.35     | 0.52     | 0.93        | 0.75     | 0.99     | 0.60        | 0.46     | 0.52     |
| <i>3 days</i>                     | 0.56        | 0.33     | 0.55     | 0.92        | 0.74     | 0.95     | 0.60        | 0.45     | 0.53     |
| <i>Unlabelled oligosaccharide</i> | 0.24        |          |          | 0.53        |          |          | 0.45        |          |          |

**Supplementary Table S5**

|                         | <b>DP5/DP8</b> | <b>DP6/DP8</b> | <b>DP5/DP6</b> |
|-------------------------|----------------|----------------|----------------|
| <i>AX10 day 1</i>       | 1.71           | 1.82           | 0.94           |
| <i>AX10 day 2</i>       | 1.77           | 1.81           | 0.99           |
| <i>AX10 day 3</i>       | 1.75           | 1.81           | 0.99           |
| <i>AX10 variability</i> | 1.74 ± 0.03    | 1.81 ± 0.01    | 0.97 ± 0.03    |
| <i>H9 day 1</i>         | 1.93           | 1.68           | 1.15           |
| <i>H9 day 2</i>         | 1.93           | 1.62           | 1.19           |
| <i>H9 day 3</i>         | 1.97           | 1.65           | 1.24           |
| <i>H9 variability</i>   | 1.94 ± 0.02    | 1.65 ± 0.03    | 1.19 ± 0.05    |
